# Supplementary material for: Ecophysiology of Freshwater Verrucomicrobia Inferred from Metagenome-Assembled Genomes
Source: mSphere. 2017 Sep 27;2(5):e00277-17. doi: 10.1128/mSphere.00277-17 (PMC5615132; doi:10.1128/mSphere.00277-17)
Supplement: FIG S2 [file sph005172368sf3.pdf]

| GH families | ME3880 | TH2746 | ME12612 | ME12173 | TE4605 | ME6381 | ME8366 | TH2747 | TH3004 | TH0989 | TH2519 | TE1800 | TH4590 | ME2014 | ME12657 | TE1301 | TH4093 | ME30509 | TH4820 |
|-------------|--------|--------|---------|---------|--------|--------|--------|--------|--------|--------|--------|--------|--------|--------|---------|--------|--------|---------|--------|
| GH29        | 2      | 22     | 0       | 1       | 0      | 0      | 0      | 17     | 19     | 24     | 4      | 5      | 6      | 0      | 0       | 0      | 14     | 3       | 13     |
| GH2         | 1      | 24     | 0       | 1       | 2      | 0      | 0      | 18     | 14     | 20     | 5      | 5      | 5      | 0      | 0       | 0      | 6      | 2       | 7      |
| GH78        | 1      | 31     | 0       | 2       | 0      | 0      | 0      | 11     | 11     | 13     | 3      | 5      | 9      | 0      | 0       | 0      | 5      | 2       | 7      |
| GH95        | 0      | 29     | 0       | 1       | 0      | 0      | 0      | 7      | 9      | 17     | 1      | 2      | 3      | 0      | 0       | 0      | 4      | 0       | 7      |
| GH106       | 0      | 21     | 1       | 0       | 0      | 0      | 0      | 4      | 9      | 12     | 1      | 2      | 1      | 0      | 0       | 0      | 3      | 1       | 10     |
| GH13        | 3      | 3      | 2       | 2       | 3      | 2      | 1      | 7      | 6      | 7      | 2      | 3      | 2      | 2      | 2       | 2      | 3      | 0       | 3      |
| GH20        | 0      | 14     | 0       | 4       | 0      | 0      | 0      | 3      | 5      | 2      | 2      | 2      | 3      | 1      | 2       | 4      | 10     | 1       | 3      |
| GH5         | 0      | 4      | 0       | 1       | 4      | 1      | 3      | 13     | 4      | 10     | 0      | 0      | 0      | 0      | 0       | 1      | 6      | 1       | 6      |
| GH28        | 0      | 1      | 0       | 0       | 0      | 0      | 0      | 7      | 11     | 2      | 8      | 8      | 3      | 1      | 0       | 1      | 0      | 1       | 3      |
| GH43        | 1      | 4      | 0       | 2       | 2      | 0      | 0      | 11     | 15     | 9      | 1      | 1      | 2      | 0      | 0       | 0      | 0      | 0       | 2      |
| GH33        | 0      | 1      | 0       | 3       | 7      | 6      | 0      | 1      | 3      | 5      | 1      | 1      | 4      | 5      | 1       | 1      | 3      | 0       | 8      |
| GH127       | 0      | 9      | 0       | 0       | 0      | 0      | 0      | 2      | 7      | 8      | 0      | 0      | 4      | 0      | 0       | 0      | 0      | 0       | 6      |
| GH16        | 0      | 1      | 0       | 0       | 0      | 0      | 0      | 8      | 6      | 7      | 0      | 0      | 0      | 6      | 1       | 3      | 0      | 0       | 3      |
| GH51        | 0      | 5      | 0       | 0       | 0      | 0      | 0      | 7      | 7      | 9      | 0      | 0      | 1      | 0      | 0       | 0      | 1      | 1       | 2      |
| GH36        | 1      | 4      | 0       | 0       | 0      | 0      | 0      | 1      | 1      | 8      | 0      | 0      | 4      | 0      | 0       | 1      | 3      | 2       | 1      |
| GH3         | 0      | 2      | 0       | 0       | 1      | 1      | 1      | 6      | 4      | 3      | 0      | 1      | 0      | 1      | 0       | 0      | 2      | 1       | 0      |
| GH32        | 0      | 6      | 0       | 0       | 0      | 0      | 0      | 6      | 0      | 3      | 0      | 0      | 2      | 0      | 0       | 0      | 0      | 0       | 6      |
| GH77        | 2      | 2      | 2       | 1       | 2      | 1      | 1      | 1      | 1      | 1      | 1      | 1      | 1      | 1      | 1       | 1      | 0      | 0       | 0      |
| GH109       | 0      | 3      | 0       | 0       | 1      | 0      | 0      | 1      | 1      | 1      | 1      | 1      | 0      | 3      | 1       | 2      | 4      | 0       | 2      |
| GH42        | 0      | 1      | 0       | 0       | 0      | 0      | 0      | 4      | 1      | 3      | 1      | 2      | 0      | 0      | 0       | 0      | 7      | 0       | 1      |
| GH27        | 0      | 4      | 0       | 0       | 1      | 0      | 0      | 5      | 3      | 3      | 0      | 0      | 0      | 0      | 0       | 0      | 0      | 0       | 2      |
| GH50        | 0      | 1      | 0       | 1       | 1      | 1      | 0      | 5      | 2      | 3      | 0      | 0      | 0      | 0      | 0       | 0      | 0      | 0       | 4      |
| GH99        | 0      | 0      | 0       | 1       | 2      | 0      | 0      | 1      | 0      | 5      | 0      | 0      | 0      | 2      | 1       | 1      | 1      | 0       | 4      |
| GH105       | 0      | 1      | 0       | 0       | 0      | 0      | 0      | 4      | 5      | 0      | 2      | 2      | 1      | 0      | 0       | 0      | 0      | 0       | 2      |
| GH130       | 0      | 4      | 0       | 1       | 1      | 0      | 1      | 4      | 1      | 1      | 0      | 0      | 0      | 0      | 0       | 0      | 4      | 0       | 1      |
| GH38        | 0      | 2      | 0       | 0       | 0      | 0      | 0      | 0      | 1      | 3      | 0      | 0      | 4      | 0      | 0       | 0      | 4      | 2       | 3      |
| GH39        | 0      | 1      | 0       | 0       | 2      | 0      | 2      | 2      | 2      | 2      | 0      | 0      | 0      | 0      | 0       | 0      | 2      | 0       | 3      |
| GH4         | 1      | 1      | 0       | 0       | 0      | 0      | 0      | 0      | 0      | 0      | 0      | 0      | 2      | 0      | 0       | 0      | 12     | 1       | 0      |
| GH74        | 0      | 1      | 0       | 1       | 1      | 0      | 0      | 2      | 1      | 6      | 0      | 0      | 1      | 0      | 0       | 0      | 1      | 0       | 1      |
| GH92        | 0      | 1      | 0       | 0       | 0      | 0      | 0      | 2      | 0      | 4      | 2      | 2      | 0      | 0      | 0       | 0      | 0      | 0       | 3      |
| GH120       | 0      | 4      | 0       | 0       | 0      | 0      | 0      | 3      | 1      | 2      | 0      | 0      | 0      | 0      | 0       | 0      | 0      | 0       | 2      |
| GH35        | 0      | 0      | 0       | 0       | 0      | 0      | 0      | 2      | 5      | 2      | 1      | 1      | 0      | 0      | 0       | 0      | 1      | 0       | 1      |
| GH23        | 0      | 0      | 0       | 0       | 0      | 0      | 1      | 2      | 1      | 2      | 1      | 1      | 2      | 0      | 0       | 0      | 1      | 0       | 1      |
| GH110       | 0      | 2      | 0       | 2       | 1      | 0      | 0      | 1      | 0      | 2      | 0      | 0      | 0      | 0      | 0       | 0      | 0      | 0       | 3      |
| GH116       | 0      | 5      | 0       | 0       | 0      | 0      | 0      | 1      | 1      | 2      | 0      | 0      | 1      | 0      | 0       | 0      | 1      | 0       | 1      |
| GH31        | 0      | 1      | 0       | 0       | 1      | 0      | 0      | 3      | 1      | 1      | 0      | 0      | 1      | 0      | 0       | 0      | 1      | 1       | 2      |
| GH63        | 0      | 1      | 1       | 0       | 1      | 0      | 0      | 2      | 0      | 2      | 0      | 0      | 1      | 0      | 0       | 0      | 3      | 0       | 0      |
| GH30        | 0      | 1      | 0       | 1       | 0      | 0      | 0      | 2      | 5      | 2      | 0      | 0      | 0      | 0      | 0       | 0      | 0      | 0       | 0      |
| GH57        | 1      | 1      | 2       | 0       | 0      | 0      | 2      | 1      | 1      | 2      | 0      | 0      | 0      | 0      | 0       | 0      | 0      | 0       | 1      |
| GH123       | 2      | 0      | 0       | 0       | 0      | 0      | 0      | 0      | 0      | 1      | 0      | 0      | 1      | 0      | 0       | 0      | 3      | 1       | 2      |
| GH128       | 0      | 0      | 0       | 1       | 0      | 0      | 0      | 1      | 2      | 0      | 0      | 0      | 0      | 0      | 2       | 2      | 0      | 0       | 1      |
| GH129       | 0      | 3      | 0       | 0       | 0      | 0      | 0      | 0      | 0      | 2      | 0      | 0      | 0      | 0      | 0       | 0      | 1      | 0       | 2      |
| GH1         | 0      | 0      | 1       | 0       | 0      | 0      | 0      | 1      | 1      | 0      | 1      | 1      | 0      | 0      | 0       | 0      | 1      | 0       | 1      |
| GH10        | 0      | 3      | 0       | 0       | 1      | 0      | 1      | 1      | 1      | 1      | 0      | 0      | 0      | 0      | 0       | 0      | 0      | 0       | 0      |
| GH117       | 0      | 1      | 0       | 1       | 0      | 0      | 0      | 1      | 3      | 1      | 0      | 0      | 0      | 0      | 0       | 0      | 0      | 0       | 1      |
| GH75        | 1      | 1      | 1       | 1       | 1      | 1      | 1      | 0      | 0      | 0      | 0      | 0      | 0      | 0      | 0       | 0      | 0      | 0       | 0      |
| GH79        | 0      | 0      | 0       | 0       | 0      | 0      | 0      | 0      | 3      | 1      | 0      | 0      | 0      | 0      | 2       | 1      | 0      | 0       | 0      |
| GH88        | 0      | 0      | 0       | 0       | 0      | 0      | 0      | 0      | 1      | 1      | 1      | 1      | 1      | 0      | 0       | 0      | 0      | 0       | 1      |
| GH94        | 0      | 2      | 0       | 0       | 0      | 0      | 0      | 0      | 0      | 1      | 0      | 0      | 0      | 0      | 0       | 0      | 1      | 2       | 0      |
| GH97        | 0      | 2      | 0       | 0       | 0      | 0      | 0      | 0      | 0      | 3      | 0      | 0      | 0      | 0      | 0       | 0      | 0      | 0       | 2      |
| GH76        | 0      | 1      | 0       | 1       | 1      | 0      | 0      | 1      | 0      | 1      | 0      | 0      | 0      | 0      | 0       | 0      | 0      | 0       | 1      |
| GH44        | 0      | 0      | 0       | 0       | 0      | 0      | 0      | 1      | 1      | 2      | 0      | 0      | 0      | 0      | 0       | 0      | 0      | 0       | 1      |
| GH9         | 0      | 1      | 0       | 0       | 0      | 0      | 0      | 1      | 0      | 1      | 0      | 0      | 0      | 0      | 0       | 0      | 2      | 0       | 0      |
| GH115       | 0      | 0      | 0       | 0       | 0      | 0      | 0      | 1      | 1      | 1      | 0      | 0      | 0      | 0      | 0       | 0      | 0      | 0       | 1      |
| GH25        | 0      | 0      | 0       | 1       | 0      | 0      | 0      | 1      | 2      | 0      | 0      | 0      | 0      | 0      | 0       | 0      | 0      | 0       | 0      |
| GH37        | 0      | 2      | 0       | 0       | 0      | 0      | 0      | 0      | 0      | 0      | 0      | 0      | 1      | 0      | 0       | 0      | 1      | 0       | 0      |
| GH59        | 0      | 1      | 0       | 0       | 0      | 0      | 0      | 0      | 1      | 2      | 0      | 0      | 0      | 0      | 0       | 0      | 0      | 0       | 0      |
| GH66        | 0      | 0      | 0       | 0       | 0      | 0      | 0      | 0      | 0      | 0      | 0      | 0      | 0      | 0      | 0       | 0      | 4      | 0       | 0      |
| GH81        | 0      | 0      | 0       | 0       | 0      | 0      | 0      | 1      | 0      | 1      | 0      | 0      | 0      | 0      | 1       | 1      | 0      | 0       | 0      |
| GH15        | 0      | 2      | 0       | 0       | 0      | 0      | 0      | 0      | 1      | 0      | 0      | 0      | 0      | 0      | 0       | 0      | 0      | 0       | 0      |
| GH18        | 0      | 0      | 0       | 0       | 1      | 0      | 0      | 0      | 0      | 1      | 0      | 0      | 0      | 0      | 0       | 0      | 1      | 0       | 0      |
| GH26        | 0      | 0      | 0       | 0       | 0      | 0      | 0      | 1      | 0      | 2      | 0      | 0      | 0      | 0      | 0       | 0      | 0      | 0       | 0      |
| GH53        | 0      | 0      | 0       | 0       | 0      | 0      | 0      | 1      | 1      | 1      | 0      | 0      | 0      | 0      | 0       | 0      | 0      | 0       | 0      |
| GH84        | 0      | 0      | 0       | 0       | 0      | 0      | 0      | 0      | 1      | 0      | 0      | 0      | 0      | 0      | 0       | 0      | 2      | 0       | 0      |
| GH89        | 0      | 2      | 0       | 0       | 0      | 0      | 0      | 0      | 1      | 0      | 0      | 0      | 0      | 0      | 0       | 0      | 0      | 0       | 0      |
| GH93        | 0      | 0      | 0       | 0       | 1      | 0      | 0      | 0      | 0      | 1      | 0      | 0      | 0      | 1      | 0       | 0      | 0      | 0       | 0      |
| GH114       | 0      | 0      | 0       | 0       | 0      | 0      | 0      | 1      | 1      | 0      | 0      | 0      | 0      | 0      | 0       | 0      | 0      | 0       | 0      |
| GH119       | 1      | 0      | 0       | 0       | 0      | 0      | 0      | 1      | 0      | 0      | 0      | 0      | 0      | 0      | 0       | 0      | 0      | 0       | 0      |
| GH121       | 0      | 0      | 0       | 1       | 0      | 0      | 0      | 0      | 1      | 0      | 0      | 0      | 0      | 0      | 0       | 0      | 0      | 0       | 0      |
| GH125       | 0      | 0      | 0       | 0       | 0      | 0      | 0      | 1      | 0      | 1      | 0      | 0      | 0      | 0      | 0       | 0      | 0      | 0       | 0      |
| GH62        | 0      | 0      | 0       | 0       | 2      | 0      | 0      | 0      | 0      | 0      | 0      | 0      | 0      | 0      | 0       | 0      | 0      | 0       | 0      |
| GH67        | 0      | 0      | 0       | 0       | 0      | 0      | 0      | 0      | 0      | 0      | 0      | 1      | 0      | 0      | 0       | 0      | 0      | 0       | 0      |
| GH100       | 0      | 0      | 0       | 0       | 0      | 0      | 0      | 0      | 0      | 0      | 0      | 0      | 0      | 0      | 0       | 0      | 0      | 0       | 1      |
| GH24        | 0      | 0      | 0       | 0       | 0      | 0      | 0      | 0      | 0      | 0      | 0      | 0      | 0      | 0      | 0       | 0      | 1      | 0       | 0      |
| GH49        | 0      | 0      | 0       | 1       | 0      | 0      | 0      | 0      | 0      | 0      | 0      | 0      | 0      | 0      | 0       | 0      | 0      | 0       | 0      |
| GH52        | 0      | 0      | 0       | 0       | 0      | 0      | 0      | 0      | 0      | 1      | 0      | 0      | 0      | 0      | 0       | 0      | 0      | 0       | 0      |
| GH55        | 0      | 0      | 0       | 0       | 0      | 0      | 0      | 0      | 0      | 1      | 0      | 0      | 0      | 0      | 0       | 0      | 0      | 0       | 0      |
| GH8         | 0      | 0      | 0       | 0       | 0      | 0      | 0      | 1      | 0      | 0      | 0      | 0      | 0      | 0      | 0       | 0      | 0      | 0       | 0      |
