# Supplementary material for: Ecophysiology of Freshwater Verrucomicrobia Inferred from Metagenome-Assembled Genomes
Source: PubMed Central journal article supplement (PMC5615132; doi:10.1128/msphere.00277-17), 2017-09-27

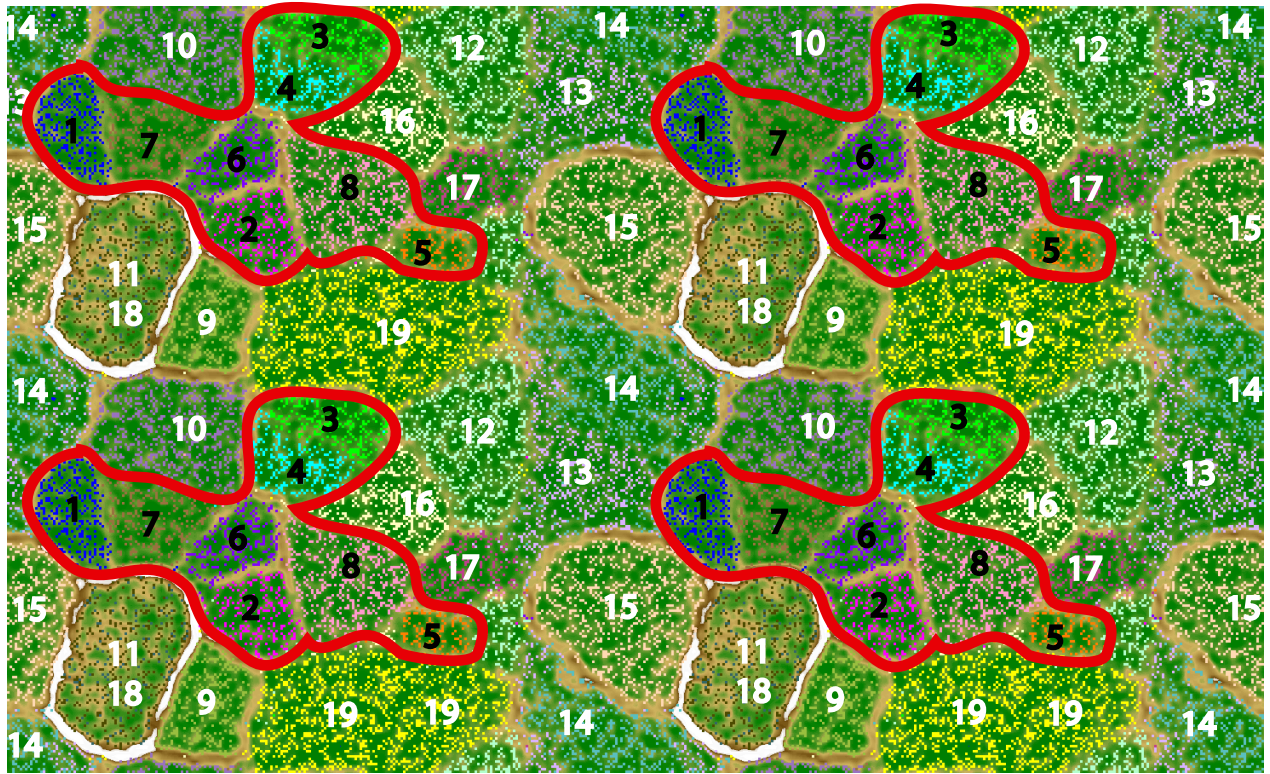

Supplement: sph005172368sf2.pdf [file sph005172368sf2.pdf]
