# Supplementary material for: Ecophysiology of Freshwater Verrucomicrobia Inferred from Metagenome-Assembled Genomes
Source: PubMed Central journal article supplement (PMC5615132; doi:10.1128/msphere.00277-17), 2017-09-27
Supplement: sph005172368sf5.pdf [file sph005172368sf5.pdf]

| COG ID                                       | Function name                                                                       | ME3880   | TH2746    | ME12612  | ME12173  | TE4605    | ME6381    | ME6366    | TH2747    | TH3004    | TH0989    | TH2519    | TE1800    | TH4590    | ME2014    | ME12657   | TE1301    | TH4093    | ME30509  | TH4820    |  |
|----------------------------------------------|-------------------------------------------------------------------------------------|----------|-----------|----------|----------|-----------|-----------|-----------|-----------|-----------|-----------|-----------|-----------|-----------|-----------|-----------|-----------|-----------|----------|-----------|--|
| <b>Carbohydrate transport and metabolism</b> |                                                                                     |          |           |          |          |           |           |           |           |           |           |           |           |           |           |           |           |           |          |           |  |
| COG2814                                      | Arabinose efflux permease                                                           | 0        | 11        | 2        | 2        | 9         | 1         | 7         | 10        | 5         | 10        | 4         | 6         | 6         | 2         | 4         | 4         | 3         | 0        | 6         |  |
| COG2271                                      | Sugar phosphate permease                                                            | 0        | 1         | 0        | 2        | 3         | 5         | 5         | 5         | 4         | 8         | 6         | 5         | 4         | 4         | 1         | 3         | 0         | 0        | 2         |  |
| COG0738                                      | Fucose permease                                                                     | 2        | 2         | 0        | 0        | 1         | 2         | 0         | 4         | 2         | 3         | 3         | 3         | 1         | 2         | 1         | 2         | 0         | 0        | 3         |  |
| COG1762                                      | Phosphotransferase system mannitol/fructose-specific IIA domain (Ntr-type)          | 2        | 1         | 1        | 1        | 1         | 0         | 1         | 2         | 1         | 4         | 1         | 1         | 3         | 0         | 0         | 1         | 4         | 3        | 2         |  |
| COG2211                                      | Na+/melibiose symporter and related transporters                                    | 1        | 2         | 0        | 0        | 0         | 0         | 1         | 5         | 5         | 3         | 0         | 1         | 0         | 0         | 0         | 0         | 7         | 0        | 0         |  |
| COG1172                                      | Ribose/xylose/arabinose/galactoside ABC-type transport systems, permease components | 0        | 1         | 0        | 2        | 1         | 1         | 4         | 2         | 2         | 3         | 0         | 0         | 0         | 1         | 1         | 0         | 0         | 2        | 0         |  |
| COG1879                                      | ABC-type sugar transport system, periplasmic component                              | 0        | 0         | 0        | 1        | 0         | 2         | 3         | 3         | 2         | 2         | 0         | 0         | 2         | 1         | 1         | 1         | 0         | 1        | 0         |  |
| COG0580                                      | Glycerol uptake facilitator and related permeases                                   | 1        | 1         | 2        | 0        | 2         | 1         | 1         | 1         | 0         | 2         | 1         | 1         | 0         | 2         | 1         | 2         | 1         | 0        | 0         |  |
| COG1129                                      | ABC-type sugar transport system, ATPase component                                   | 0        | 1         | 0        | 1        | 1         | 1         | 3         | 1         | 1         | 2         | 1         | 1         | 0         | 1         | 1         | 0         | 0         | 1        | 0         |  |
| COG1925                                      | Phosphotransferase system, HPR-related proteins                                     | 1        | 1         | 1        | 0        | 1         | 0         | 1         | 1         | 1         | 0         | 1         | 1         | 1         | 1         | 1         | 1         | 1         | 1        | 1         |  |
| COG1653                                      | ABC-type sugar transport system, periplasmic component                              | 0        | 1         | 0        | 0        | 0         | 0         | 0         | 0         | 1         | 0         | 0         | 0         | 10        | 0         | 0         | 0         | 1         | 0        | 1         |  |
| COG1682                                      | ABC-type polysaccharide/polyol phosphate export systems, permease component         | 1        | 0         | 0        | 0        | 0         | 0         | 0         | 0         | 1         | 1         | 0         | 0         | 2         | 0         | 0         | 0         | 0         | 0        | 2         |  |
| COG1134                                      | ABC-type polysaccharide/polyol phosphate transport system, ATPase component         | 1        | 0         | 0        | 0        | 0         | 0         | 0         | 0         | 1         | 1         | 0         | 0         | 2         | 0         | 0         | 0         | 0         | 0        | 2         |  |
| COG0395                                      | ABC-type sugar transport system, permease component                                 | 0        | 0         | 0        | 0        | 0         | 0         | 0         | 0         | 0         | 0         | 0         | 0         | 4         | 0         | 0         | 0         | 1         | 0        | 0         |  |
| COG3839                                      | ABC-type sugar transport systems, ATPase components                                 | 0        | 0         | 0        | 0        | 0         | 0         | 0         | 0         | 0         | 1         | 1         | 1         | 1         | 0         | 0         | 0         | 1         | 0        | 0         |  |
| COG4213                                      | ABC-type xylose transport system, periplasmic component                             | 0        | 0         | 0        | 0        | 1         | 1         | 0         | 0         | 0         | 0         | 1         | 1         | 1         | 0         | 0         | 0         | 0         | 0        | 0         |  |
| COG1869                                      | ABC-type ribose transport system, auxiliary component                               | 0        | 1         | 0        | 0        | 0         | 0         | 0         | 1         | 1         | 1         | 0         | 0         | 0         | 0         | 0         | 0         | 0         | 0        | 0         |  |
| COG1175                                      | ABC-type sugar transport systems, permease components                               | 0        | 0         | 0        | 0        | 0         | 0         | 0         | 0         | 0         | 0         | 0         | 0         | 3         | 0         | 0         | 0         | 1         | 0        | 0         |  |
| COG4214                                      | ABC-type xylose transport system, permease component                                | 0        | 0         | 0        | 0        | 1         | 0         | 0         | 0         | 0         | 0         | 1         | 1         | 1         | 0         | 0         | 0         | 0         | 0        | 0         |  |
| COG2610                                      | H+/gluconate symporter and related permeases                                        | 0        | 0         | 0        | 0        | 0         | 1         | 0         | 0         | 0         | 0         | 0         | 1         | 0         | 0         | 1         | 1         | 0         | 0        | 0         |  |
| COG1593                                      | TRAP-type C4-dicarboxylate transport system, large permease component               | 0        | 0         | 0        | 0        | 0         | 0         | 0         | 0         | 0         | 1         | 0         | 0         | 1         | 0         | 0         | 0         | 0         | 0        | 0         |  |
| COG1638                                      | TRAP-type C4-dicarboxylate transport system, periplasmic component                  | 0        | 0         | 0        | 0        | 0         | 0         | 0         | 0         | 0         | 1         | 0         | 0         | 1         | 0         | 0         | 0         | 0         | 0        | 0         |  |
| COG1445                                      | Phosphotransferase system fructose-specific component IIB                           | 0        | 0         | 0        | 0        | 0         | 0         | 0         | 0         | 0         | 1         | 0         | 0         | 0         | 0         | 0         | 0         | 0         | 0        | 0         |  |
| COG1299                                      | Phosphotransferase system, fructose-specific IIC component                          | 0        | 0         | 0        | 0        | 0         | 0         | 0         | 0         | 0         | 1         | 0         | 0         | 0         | 0         | 0         | 0         | 0         | 0        | 0         |  |
| COG4975                                      | Putative glucose uptake permease                                                    | 0        | 0         | 0        | 0        | 0         | 0         | 0         | 0         | 0         | 1         | 0         | 0         | 0         | 0         | 0         | 0         | 0         | 0        | 0         |  |
| <b>Sum</b>                                   |                                                                                     | <b>9</b> | <b>23</b> | <b>6</b> | <b>9</b> | <b>21</b> | <b>15</b> | <b>26</b> | <b>35</b> | <b>27</b> | <b>46</b> | <b>20</b> | <b>23</b> | <b>43</b> | <b>14</b> | <b>12</b> | <b>15</b> | <b>20</b> | <b>8</b> | <b>19</b> |  |

|                                            |                                                                                  |          |           |           |           |           |           |           |           |           |           |           |           |           |          |           |           |           |          |          |  |
|--------------------------------------------|----------------------------------------------------------------------------------|----------|-----------|-----------|-----------|-----------|-----------|-----------|-----------|-----------|-----------|-----------|-----------|-----------|----------|-----------|-----------|-----------|----------|----------|--|
| <b>Amino acid transport and metabolism</b> |                                                                                  |          |           |           |           |           |           |           |           |           |           |           |           |           |          |           |           |           |          |          |  |
| COG0591                                    | Na+/proline symporter                                                            | 2        | 0         | 2         | 1         | 1         | 2         | 2         | 2         | 4         | 5         | 3         | 3         | 4         | 0        | 1         | 1         | 6         | 0        | 0        |  |
| COG0601                                    | ABC-type dipeptide/oligopeptide/nickel transport systems, permease components    | 0        | 0         | 2         | 1         | 3         | 1         | 2         | 2         | 0         | 1         | 1         | 1         | 1         | 2        | 3         | 2         | 2         | 1        | 1        |  |
| COG0531                                    | Amino acid transporters                                                          | 0        | 3         | 0         | 0         | 2         | 2         | 2         | 0         | 1         | 4         | 2         | 3         | 1         | 0        | 0         | 1         | 0         | 0        | 3        |  |
| COG0444                                    | ABC-type dipeptide/oligopeptide/nickel transport system, ATPase component        | 1        | 1         | 1         | 1         | 2         | 2         | 1         | 1         | 0         | 1         | 1         | 1         | 2         | 1        | 1         | 1         | 1         | 1        | 0        |  |
| COG4166                                    | ABC-type oligopeptide transport system, periplasmic component                    | 0        | 0         | 1         | 1         | 2         | 2         | 1         | 1         | 0         | 0         | 3         | 4         | 2         | 0        | 1         | 0         | 0         | 0        | 0        |  |
| COG3104                                    | Dipeptide/tripeptide permease                                                    | 0        | 1         | 0         | 1         | 1         | 1         | 2         | 1         | 1         | 2         | 1         | 1         | 2         | 1        | 1         | 1         | 0         | 0        | 1        |  |
| COG1173                                    | ABC-type dipeptide/oligopeptide/nickel transport systems, permease components    | 0        | 0         | 1         | 1         | 2         | 1         | 1         | 2         | 0         | 1         | 1         | 1         | 1         | 1        | 1         | 1         | 1         | 0        | 1        |  |
| COG3842                                    | ABC-type spermidine/putrescine transport systems, ATPase components              | 0        | 1         | 2         | 0         | 2         | 1         | 1         | 1         | 0         | 2         | 1         | 1         | 1         | 1        | 1         | 1         | 0         | 1        | 0        |  |
| COG0747                                    | ABC-type dipeptide transport system, periplasmic component                       | 0        | 1         | 1         | 1         | 1         | 2         | 1         | 1         | 0         | 1         | 0         | 0         | 0         | 1        | 1         | 1         | 2         | 1        | 0        |  |
| COG1280                                    | Putative threonine efflux protein                                                | 0        | 1         | 0         | 1         | 0         | 0         | 0         | 1         | 1         | 1         | 2         | 2         | 1         | 1        | 1         | 1         | 0         | 0        | 1        |  |
| COG0410                                    | ABC-type branched-chain amino acid transport systems, ATPase component           | 0        | 0         | 0         | 1         | 0         | 0         | 1         | 1         | 1         | 2         | 0         | 0         | 1         | 0        | 0         | 1         | 0         | 0        | 0        |  |
| COG0683                                    | ABC-type branched-chain amino acid transport systems, periplasmic component      | 0        | 0         | 0         | 0         | 0         | 0         | 1         | 1         | 1         | 2         | 0         | 0         | 2         | 0        | 0         | 0         | 1         | 0        | 0        |  |
| COG0559                                    | Branched-chain amino acid ABC-type transport system, permease components         | 0        | 0         | 0         | 1         | 0         | 0         | 1         | 1         | 1         | 2         | 0         | 0         | 1         | 0        | 0         | 1         | 0         | 0        | 0        |  |
| COG4177                                    | ABC-type branched-chain amino acid transport system, permease component          | 0        | 0         | 0         | 1         | 0         | 0         | 1         | 0         | 1         | 2         | 0         | 0         | 1         | 0        | 0         | 1         | 0         | 0        | 0        |  |
| COG1177                                    | ABC-type spermidine/putrescine transport system, permease component II           | 1        | 0         | 1         | 1         | 1         | 1         | 0         | 0         | 0         | 0         | 0         | 0         | 0         | 0        | 0         | 0         | 1         | 0        | 0        |  |
| COG0411                                    | ABC-type branched-chain amino acid transport systems, ATPase component           | 0        | 0         | 0         | 0         | 0         | 0         | 1         | 1         | 1         | 1         | 0         | 0         | 1         | 0        | 0         | 0         | 0         | 0        | 0        |  |
| COG1176                                    | ABC-type spermidine/putrescine transport system, permease component I            | 1        | 0         | 1         | 0         | 1         | 1         | 0         | 0         | 0         | 0         | 0         | 0         | 0         | 0        | 0         | 0         | 1         | 0        | 0        |  |
| COG0687                                    | Spermidine/putrescine-binding periplasmic protein                                | 1        | 0         | 1         | 1         | 1         | 0         | 0         | 0         | 0         | 0         | 0         | 0         | 0         | 0        | 0         | 0         | 1         | 0        | 0        |  |
| COG0687                                    | Spermidine/putrescine-binding periplasmic protein                                | 1        | 0         | 1         | 1         | 1         | 0         | 0         | 0         | 0         | 0         | 0         | 0         | 0         | 0        | 0         | 0         | 1         | 0        | 0        |  |
| COG0765                                    | ABC-type amino acid transport system, permease component                         | 0        | 1         | 0         | 0         | 1         | 1         | 1         | 0         | 0         | 0         | 0         | 0         | 0         | 0        | 0         | 0         | 0         | 0        | 0        |  |
| COG1126                                    | ABC-type polar amino acid transport system, ATPase component                     | 0        | 1         | 0         | 0         | 1         | 1         | 1         | 0         | 0         | 0         | 0         | 0         | 0         | 0        | 0         | 0         | 0         | 0        | 0        |  |
| COG0834                                    | ABC-type amino acid transport/signal transduction systems, periplasmic component | 0        | 1         | 0         | 0         | 1         | 0         | 1         | 0         | 0         | 0         | 0         | 0         | 0         | 0        | 0         | 0         | 0         | 0        | 0        |  |
| COG4608                                    | ABC-type oligopeptide transport system, ATPase component                         | 0        | 0         | 0         | 0         | 0         | 0         | 0         | 1         | 0         | 1         | 0         | 0         | 0         | 0        | 0         | 0         | 1         | 0        | 0        |  |
| COG4413                                    | Urea transporter                                                                 | 0        | 1         | 0         | 0         | 0         | 0         | 0         | 1         | 0         | 1         | 0         | 0         | 0         | 0        | 0         | 0         | 0         | 0        | 0        |  |
| COG1115                                    | Na+/alanine symporter                                                            | 0        | 0         | 1         | 0         | 0         | 0         | 0         | 0         | 0         | 0         | 0         | 0         | 0         | 0        | 0         | 0         | 0         | 0        | 0        |  |
| <b>Sum</b>                                 |                                                                                  | <b>7</b> | <b>12</b> | <b>15</b> | <b>14</b> | <b>23</b> | <b>18</b> | <b>21</b> | <b>18</b> | <b>12</b> | <b>29</b> | <b>15</b> | <b>17</b> | <b>21</b> | <b>8</b> | <b>11</b> | <b>13</b> | <b>18</b> | <b>4</b> | <b>7</b> |  |
