# Supplementary material for: Ecophysiology of Freshwater Verrucomicrobia Inferred from Metagenome-Assembled Genomes
Source: PubMed Central journal article supplement (PMC5615132; doi:10.1128/msphere.00277-17), 2017-09-27
Supplement: sph005172368sf6.pdf [file sph005172368sf6.pdf]

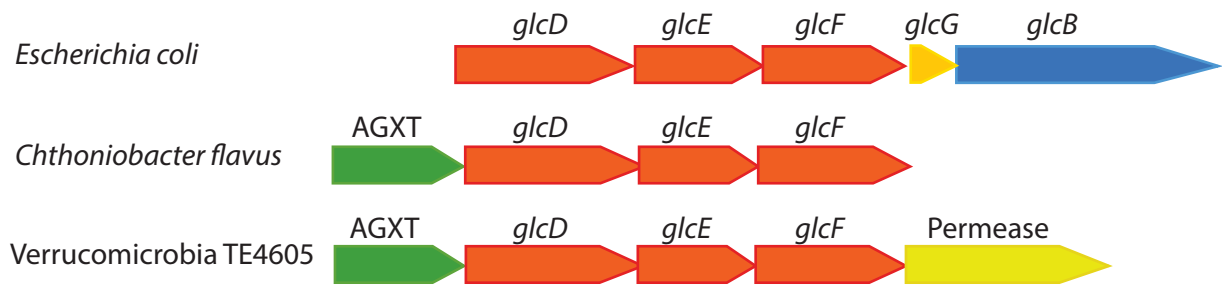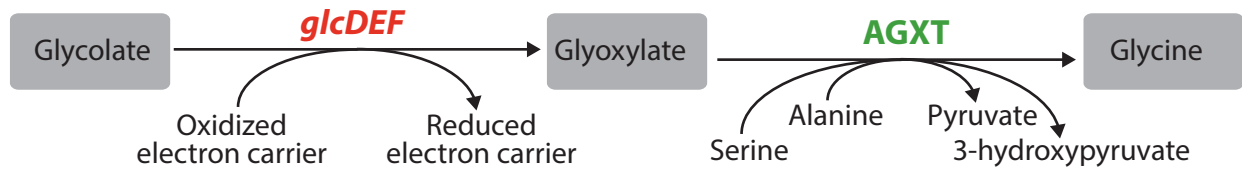

*glcDEF*: subunits of glycolate oxidase

*glcG*: Uncharacterized *glc* operon protein GlcG

*glcB*: Malate synthase G

AGXT: Alanine-glyoxylate transaminase / serine-glyoxylate transaminase / serine-pyruvate transaminase

Permease: L-lactate permease family to which GlcA (glycolate permease) belongs to.
