# Supplementary material for: Ecophysiology of Freshwater Verrucomicrobia Inferred from Metagenome-Assembled Genomes
Source: PubMed Central journal article supplement (PMC5615132; doi:10.1128/msphere.00277-17), 2017-09-27
Supplement: sph005172368sf7.pdf [file sph005172368sf7.pdf]

| Genes and Pathways                                              | ME3880 | TH2746 | ME12612 | ME12173 | TE4605 | ME6381 | ME8366 | TH2747 | TH3004 | TH0989 | TH2519 | TE1800 | TH4590 | ME2014 | ME12657 | TE1301 | TH4093 | ME30509 | TH4820 |  |
|-----------------------------------------------------------------|--------|--------|---------|---------|--------|--------|--------|--------|--------|--------|--------|--------|--------|--------|---------|--------|--------|---------|--------|--|
| <b>Central carbon metabolism</b>                                |        |        |         |         |        |        |        |        |        |        |        |        |        |        |         |        |        |         |        |  |
| Glycolysis (Embden-Meyerhof pathway), glucose => pyruvate       | 0.78   | 0.89   | 0.89    | 0.67    | 1      | 0.89   | 0.78   | 1      | 0.89   | 1      | 0.67   | 0.89   | 1      | 0.89   | 0.56    | 1      | 0.89   | 0.56    | 0.33   |  |
| Glycolysis (Entner-Doudoroff pathway)                           | (0)    | (0)    | (0)     | (0)     | (0)    | (0)    | (0)    | (0)    | (0)    | (0)    | (0)    | (0)    | (0)    | (0)    | (0)     | (0)    | (0)    | (0)     | (0)    |  |
| Pentose phosphate pathway (Pentose phosphate cycle)             | 0.86   | 0.71   | 0.71    | 0.71    | 0.86   | 0.57   | 0.71   | 1      | 0.86   | 1      | 0.71   | 0.86   | 1      | 0.86   | 0.57    | 1      | 0.71   | 0.29    | 0.43   |  |
| Pyruvate oxidation, pyruvate => acetyl-CoA                      | 1      | 1      | 1       | 0       | 1      | 1      | 1      | 1      | 1      | 1      | 1      | 1      | 1      | 1      | 1       | 1      | 1      | 1       | 1      |  |
| Citrate cycle (TCA cycle, Krebs cycle)                          | 0.63   | 0.88   | 1       | 0.38    | 0.75   | 0.63   | 0.88   | 0.88   | 0.88   | 0.75   | 1      | 1      | 0.88   | 0.63   | 0.75    | 1      | 0.5    | 0.25    | 0.25   |  |
| <b>Other carbohydrate and carbon metabolism</b>                 |        |        |         |         |        |        |        |        |        |        |        |        |        |        |         |        |        |         |        |  |
| Galactose degradation to glycerate-3P                           | 0.5    | 0.75   | 0.75    | 0.25    | 0.75   | 0.5    | 0.5    | 1      | 0.75   | 1      | 0.5    | 0.5    | 0.75   | 0.25   | 0.25    | 0.5    | 0.75   | 0.25    | 0.5    |  |
| Rhamnose degradation                                            | 1      | 1      | 0.75    | 0.5     | 0.5    | 0.5    | 0.5    | 1      | 1      | 1      | 0.75   | 1      | 0.75   | 0.5    | 0.5     | 0.5    | 1      | 0.5     | 0.75   |  |
| Fucose degradation                                              | 1      | 0.75   | 0.75    | 0.25    | 0.75   | 0.5    | 0.75   | 1      | 0.75   | 0.75   | 0.5    | 0.75   | 0.75   | 0.75   | 0.5     | 0.75   | 1      | 0.75    | 0.75   |  |
| L-Arabinose degradation to xylulose-5P for pentose pathway      | 1      | 1      | 0       | 0       | 0.67   | 0.33   | 0.33   | 1      | 1      | 1      | 0      | 0      | 0.33   | 0      | 0       | 0      | 0.67   | 0.33    | 0.33   |  |
| Xylose degradation                                              | 1      | 1      | 1       | 1       | 1      | 0.5    | 1      | 1      | 1      | 1      | 0.5    | 1      | 1      | 1      | 1       | 1      | 0.5    | 1       | 1      |  |
| D-Galacturonate degradation to pyruvate & D-glyceraldehyde 3P   | (0)    | (0)    | (0)     | (0)     | 0.8    | 0.2    | (0)    | 0.6    | (0)    | (0)    | (0)    | (0)    | (0)    | (0)    | (0)     | (0)    | (0)    | (0)     | (0)    |  |
| D-Glucuronate degradation to pyruvate and D-glyceraldehyde 3P   | 0      | 0.6    | 0.4     | 0.4     | 0.6    | 0      | 0.2    | 0.6    | 0.8    | 0.6    | 0.6    | 0.8    | 0.6    | 0.2    | 0.4     | 0.4    | 0.6    | 0.4     | 0.8    |  |
| Mannose degradation to glucose-P                                | 0.5    | 1      | 1       | 1       | 1      | 1      | 1      | 1      | 1      | 1      | 1      | 1      | 1      | 1      | 0.5     | 0.5    | 1      | 0.75    | 0.75   |  |
| Lactaldehyde degradation to pyruvate (Aerobic)                  | 1      | 1      | 0.33    | 1       | 0.33   | 0.33   | 1      | 1      | 1      | 0.67   | 0.33   | 0.33   | 1      | 0.33   | 0.33    | 0.33   | 0.67   | 0.67    | 0.67   |  |
| Fatty acid biosynthesis                                         | 1      | 1      | 1       | 1       | 1      | 1      | 1      | 1      | 1      | 1      | 1      | 1      | 1      | 1      | 1       | 1      | 1      | 1       | 1      |  |
| Glycogen biosynthesis from alpha-D-glucose-6P via ADP-D glucose | 0.75   | 0.25   | 0.75    | 0.75    | 0.75   | 0.5    | 1      | 1      | 0.75   | 1      | 0.5    | 0.5    | 1      | 1      | 1       | 1      | 0.5    | 0       | 0.75   |  |
| Glyoxylate cycle                                                | (0)    | (0)    | (0)     | (0)     | (0)    | (0)    | (0)    | (0)    | (0)    | (0)    | (0)    | (0)    | (0)    | (0)    | (0)     | (0)    | (0)    | (0)     | (0)    |  |
| Ethylmalonyl pathway, alternative to glyoxylate cycle           | 0      | 0.43   | 0       | 0       | 0      | 0      | 0      | 0      | 0      | 0      | 0      | 0      | 0      | 0      | 0       | 0      | 0      | 0       | 0      |  |
| <b>Hydrogenase</b>                                              |        |        |         |         |        |        |        |        |        |        |        |        |        |        |         |        |        |         |        |  |
| Iron-only [FeFe]-hydrogenase                                    | 0      | 1      | 0       | 0       | 0      | 0      | 0      | 0      | 0      | 1      | 0      | 0      | 1      | 0      | 0       | 0      | 1      | 1       | 1      |  |
| [NiFe]-hydrogenase                                              | 0      | 1      | 0       | 0       | 0      | 0      | 0      | 0      | 0      | 0      | 0      | 0      | 0      | 0      | 0       | 0      | 0      | 0       | 0      |  |
| Group 1 [NiFe]-hydrogenase, H2 uptake                           | 0      | 0      | 0       | 0       | 0      | 0      | 0      | 0      | 0      | 0      | 0      | 0      | 0      | 0      | 0       | 0      | 0      | 0       | 0      |  |
| Group 2 [NiFe]-hydrogenase, H2 sensing                          | 0      | 0      | 0       | 0       | 0      | 0      | 0      | 1      | 1      | 1      | 1      | 1      | 1      | 0      | 0       | 0      | 0      | 0       | 0      |  |
| Group 3 [NiFe]-hydrogenase, NAD(P)-reducing                     | 0      | 0      | 0       | 0       | 0      | 0      | 0      | 1      | 1      | 1      | 0      | 0      | 0      | 0      | 0       | 0      | 0      | 0       | 0      |  |
| Group 4 [NiFe]-hydrogenase, H2 evolving                         | 0      | 1      | 0       | 0       | 0      | 0      | 0      | 1      | 0      | 1      | 0      | 0      | 0.5    | 0      | 0       | 0      | 1      | 1       | 1      |  |
| <b>Fermentation</b>                                             |        |        |         |         |        |        |        |        |        |        |        |        |        |        |         |        |        |         |        |  |
| Pyruvate to acetate via acetyl-coA                              | 1      | 1      | 0.67    | 0.67    | 0.33   | 0.33   | 1      | 1      | 1      | 0.67   | 0.33   | 0.33   | 1      | 0.67   | 0.67    | 0.67   | 1      | 1       | 1      |  |
| Pyruvate to propanoate                                          | (0)    | (0)    | (0)     | (0)     | (0)    | (0)    | (0)    | (0)    | (0)    | (0)    | (0)    | (0)    | (0)    | (0)    | (0)     | (0)    | (0)    | (0)     | (0)    |  |
| Pyruvate to succinate                                           | (0)    | (0)    | (0)     | (0)     | (0)    | (0)    | (0)    | (0)    | (0)    | (0)    | (0)    | (0)    | (0)    | (0)    | (0)     | (0)    | (0)    | (0)     | (0)    |  |
| Pyruvate to butanoate                                           | (0)    | (0)    | (0)     | (0)     | (0)    | (0)    | (0)    | (0)    | (0)    | (0)    | (0)    | (0)    | (0)    | (0)    | (0)     | (0)    | (0)    | (0)     | (0)    |  |
| Pyruvate to butanol                                             | 0.71   | 0.71   | 0.71    | 0.29    | 1      | 0.71   | 0.57   | 0.43   | 0.43   | 0.43   | 0.57   | 0.57   | 1      | 0.57   | 0.57    | 0.57   | 0.43   | 0.43    | 0.43   |  |
| Pyruvate to ethanol                                             | (0)    | (0)    | (0)     | (0)     | (0)    | (0)    | (0)    | (0)    | (0)    | (0)    | (0)    | (0)    | (0)    | (0)    | (0)     | (0)    | (0)    | (0)     | (0)    |  |
| Pyruvate to lactate                                             | 0      | 0      | 0       | 0       | 0      | 0      | 0      | 0      | 0      | 0      | 1      | 1      | 1      | 0      | 0       | 0      | 0      | 0       | 0      |  |
| Pyruvate to acetone                                             | (0)    | (0)    | (0)     | (0)     | (0)    | (0)    | (0)    | (0)    | (0)    | (0)    | (0)    | (0)    | (0)    | (0)    | (0)     | (0)    | (0)    | (0)     | (0)    |  |
| <b>Nitrogen related</b>                                         |        |        |         |         |        |        |        |        |        |        |        |        |        |        |         |        |        |         |        |  |
| Dissimilatory nitrate reduction, nitrate => ammonia             | 0      | 0      | 0       | 0       | 0      | 0      | 0      | 0      | 0      | 0      | 0      | 0      | (0)    | 0      | 0       | 0      | 0      | 0       | (0)    |  |
| Denitrification, nitrate => nitrogen gas                        | 0      | 0      | 0       | 0       | 0      | 0      | 0      | 0.25   | 0.25   | 0      | 0      | 0      | 0      | 0      | 0       | 0      | 0      | 0       | 0      |  |
| TMAO (trimethylamine-N-oxide) reductoin                         | 0      | 0      | 0       | 0       | 0      | 0      | 0      | 0      | 0      | 0      | 0      | 0      | 0      | 0      | 0       | 0      | 0      | 0       | 0      |  |
| Nitrification, ammonia => nitrite                               | 0      | 0      | 0       | 0       | 0      | 0      | 0      | 0      | 0      | 0      | 0      | 0      | 0      | 0      | 0       | 0      | 0      | 0       | 0      |  |
| Nitrogen fixation, nitrogen => ammonia                          | 0      | 0      | 0       | 0       | 0      | 0      | 0      | 1      | 0      | 1      | 0      | 0      | 0      | 0      | 0       | 0      | 1      | 0       | 0      |  |
| Assimilatory nitrate reduction, nitrate => ammonia              | 0      | 1      | 0       | 0       | (0)    | 0      | 0      | 0      | 0      | 0      | 0      | 0      | 0      | 0      | 0       | 0      | (0)    | 0       | (0)    |  |
| Urease (Urea ==> CO2 + NH3)                                     | 0      | 0      | 0       | 0       | 0      | 0      | 0      | 0      | 0      | 0      | 1      | 0      | 1      | 0      | 0       | 1      | 0      | 0       | 0      |  |
| Ammonia permease                                                | 1      | 1      | 1       | 1       | 1      | 1      | 1      | 1      | 1      | 1      | 0      | 0      | 1      | 0      | 1       | 1      | 1      | 0       | 1      |  |
| <b>Sulfur related</b>                                           |        |        |         |         |        |        |        |        |        |        |        |        |        |        |         |        |        |         |        |  |
| Dissimilatory sulfate reduction, sulfate => H2S                 | 0      | (0)    | (0)     | 0       | (0)    | (0)    | (0)    | (0)    | (0)    | (0)    | 0      | 0      | 0.67   | 0      | 0       | (0)    | (0)    | (0)     | 0      |  |
| Dimethyl sulfoxide (DMSO) reduction                             | 0      | 0      | 0       | 0       | 0      | 0      | 0      | 0      | 0      | 0      | 0      | 0      | 0      | 0      | 0       | 0      | 0      | 0       | 0      |  |
| Polysulfide reduction                                           | 0      | 0      | 0       | 0       | 0      | 0      | 0      | 0      | 0      | 0      | 0      | 0      | 0      | 0      | 0       | 0      | 0      | 0       | 0      |  |
| Thiosulfate oxidation by SOX complex, thiosulfate => sulfate    | 0      | 0      | 0       | 0       | 0      | 0      | 0      | 0      | 0      | 0      | 0      | 0      | 0      | 0      | 0       | 0      | 0      | 0       | 0      |  |
| Alkanesulfonate oxidation to sulfite                            | 0      | 0.5    | 0       | 0       | 0.75   | 0      | 0      | 0      | 0      | 0      | 0      | 0      | 0      | 0      | 0       | 0      | 0.5    | 0       | 0      |  |
| ABC-type sulfate transport system                               | 1      | 1      | 1       | 1       | 0      | 1      | 1      | 1      | 1      | 1      | 1      | 1      | 1      | 0      | 1       | 1      | 1      | 0       | 0      |  |
| Sulfate permease                                                | 1      | 1      | 1       | 0.67    | 1      | 0.67   | 1      | 0.67   | 1      | 1      | 0.33   | 0.33   | 1      | 0.33   | 1       | 1      | 0.67   | 1       | 0.33   |  |
| Assimilatory sulfate reduction, sulfate => H2S                  | 0.67   | 0.67   | 1       | 0.67    | 1      | 0.67   | 1      | 0.67   | 1      | 1      | 0.33   | 0.33   | 1      | 0.33   | 1       | 1      | 0.67   | 1       | 0.33   |  |
| <b>Phosphorus related</b>                                       |        |        |         |         |        |        |        |        |        |        |        |        |        |        |         |        |        |         |        |  |
| Alkaline phosphatase                                            | 1      | 1      | 1       | 1       | 0      | 0      | 1      | 0      | 0      | 0      | 0      | 0      | 0      | 1      | 1       | 1      | 1      | 0       | 0      |  |
| High-affinity phosphate specific transport (Pst) system         | 0      | 1      | 1       | 1       | 1      | 1      | 1      | 1      | 1      | 1      | 1      | 1      | 1      | 0      | 1       | 1      | 1      | 1       | 0      |  |
| PIT inorganic phosphate transporter, low affinity               | 0      | 0      | 0       | 0       | 1      | 1      | 1      | 1      | 1      | 1      | 1      | 1      | 1      | 1      | 1       | 1      | 0      | 0       | 1      |  |
| Polyphosphate storage and utilization                           | 0      | 1      | 1       | 1       | 1      | 1      | 1      | 1      | 1      | 1      | 1      | 1      | 1      | 1      | 1       | 1      | 1      | 1       | 0      |  |
| ABC-type phosphonate transport system                           | 0      | 0      | 0       | 0       | 0      | 0      | 0      | 0      | 0      | 0      | 0      | 0      | 0      | 0      | 0       | 0      | 0      | 0       | 0      |  |
| Methylphosphonate degradation                                   | 0      | 0      | 0       | 0       | 0      | 0      | 0      | 0      | 0      | 0      | 0      | 0      | 0      | 0      | 0       | 0      | 0      | 0       | 0      |  |
| Phosphonoacetate degradation                                    | 0      | 1      | 0       | 1       | 1      | 0      | 1      | 1      | 1      | 0      | 0      | 0      | 1      | 0      | 0       | 0      | 0      | 0       | 0      |  |
| <b>Sensitivity and tolerance to oxygen</b>                      |        |        |         |         |        |        |        |        |        |        |        |        |        |        |         |        |        |         |        |  |
| Superoxide dismutase (SOD)                                      | 1      | 1      | 1       | 1       | 1      | 1      | 1      | 1      | 1      | 1      | 1      | 1      | 1      | 1      | 1       | 1      | 0      | 0       | 1      |  |
| Catalase-peroxidase, katG                                       | 0      | 1      | 0       | 1       | 1      | 0      | 0      | 0      | 0      | 1      | 0      | 0      | 1      | 1      | 1       | 1      | 0      | 0       | 0      |  |
| <b>Oxidative phosphorylation</b>                                |        |        |         |         |        |        |        |        |        |        |        |        |        |        |         |        |        |         |        |  |
| NADH:quinone oxidoreductase (Complex I)                         | 0.64   | 0.91   | 0.91    | 0.73    | 1      | 0.73   | 0.91   | 1      | 1      | 1      | 0.36   | 1      | 1      | 0.73   | 0.82    | 1      | 0.27   | 0.18    | 0.73   |  |
| Succinate dehydrogenase complex (Complex II)                    | 0.33   | 1      | 1       | 1       | 1      | 1      | 1      | 0.67   | 0.67   | 1      | 1      | 1      | 1      | 0.67   | 0       | 1      | 0      | 0       | 0      |  |
| Cytochrome bc1 complex (Complex III)                            | 0      | 0      | 0       | 0       | 0      | 0      | 0      | 0      | 0      | 0      | 0      | 0      | 0      | 0      | 0       | 0      | 0      | 0       | 0      |  |
| Alternative Complex III, ACIII                                  | 0.33   | 1      | 0.5     | 0.83    | 1      | 0.33   | 1      | 1      | 1      | 1      | 0.67   | 1      | 1      | 1      | 0.83    | 1      | 0      | 0       | 0      |  |
| Cytochrome c oxidase, aa3 type (Complex IV)                     | 0      | 1      | 0.5     | 1       | 1      | 0.5    | 1      | 1      | 1      | 1      | 0      | 0      | 1      | 1      | 0.5     | 1      | 0      | 0       | 0      |  |
| Cytochrome c oxidase, cbb3-type (Complex IV)                    | 0      | 1      | 1       | 0.5     | 1      | 0      | 1      | 0.5    | 1      | 0.5    | 1      | 1      | 0.5    | 0.5    | 0.5     | 0.5    | 0      | 0       | 0      |  |
| F-type ATPase complex (Complex V)                               | 0      | 1      | 0.63    | 0       | 1      | 1      | 1      | 1      | 0.88   | 1      | 1      | 1      | 1      | 0.25   | 0       | 1      | 0      | 0       | 0      |  |
