# Supplementary material for: Ecophysiology of Freshwater Verrucomicrobia Inferred from Metagenome-Assembled Genomes
Source: PubMed Central journal article supplement (PMC5615132; doi:10.1128/msphere.00277-17), 2017-09-27
Supplement: sph005172368sf8.pdf [file sph005172368sf8.pdf]

| pfam      | Domain name | ME3880 | TH2746 | ME12612 | ME12173 | TE4605 | ME6381 | ME8366 | TH2747 | TH3004 | TH0989 | TH2519 | TE1800 | TH4590 | ME2014 | ME12657 | TE1301 | TH4093 | ME30509 | TH4820 |
|-----------|-------------|--------|--------|---------|---------|--------|--------|--------|--------|--------|--------|--------|--------|--------|--------|---------|--------|--------|---------|--------|
| pfam07635 | PSCyt1      | 0      | 5      | 6       | 11      | 63     | 34     | 30     | 2      | 3      | 12     | 4      | 5      | 1      | 28     | 22      | 18     | 0      | 0       | 1      |
| pfam07583 | PSCyt2      | 1      | 5      | 6       | 12      | 50     | 29     | 26     | 2      | 2      | 12     | 1      | 2      | 1      | 22     | 17      | 14     | 0      | 0       | 3      |
| pfam07587 | PSD1        | 1      | 5      | 6       | 12      | 51     | 31     | 27     | 2      | 2      | 12     | 1      | 1      | 1      | 23     | 17      | 13     | 0      | 0       | 3      |
| pfam07394 | DUF1501     | 1      | 8      | 7       | 9       | 71     | 50     | 32     | 5      | 3      | 14     | 3      | 3      | 2      | 22     | 16      | 12     | 0      | 0       | 4      |
| pfam07627 | PSCyt3      | 0      | 0      | 2       | 4       | 17     | 6      | 6      | 0      | 0      | 1      | 1      | 1      | 0      | 9      | 3       | 5      | 0      | 0       | 0      |
| pfam07624 | PSD2        | 0      | 0      | 2       | 2       | 15     | 5      | 8      | 0      | 0      | 1      | 1      | 1      | 0      | 8      | 2       | 4      | 0      | 0       | 0      |
| pfam07626 | PSD3        | 0      | 0      | 2       | 3       | 16     | 6      | 2      | 0      | 0      | 1      | 1      | 1      | 0      | 7      | 2       | 4      | 0      | 0       | 0      |
| pfam07631 | PSD4        | 0      | 0      | 2       | 4       | 16     | 7      | 6      | 0      | 0      | 1      | 1      | 1      | 0      | 9      | 3       | 5      | 0      | 0       | 0      |
| pfam07637 | PSD5        | 0      | 0      | 2       | 4       | 16     | 6      | 2      | 0      | 0      | 1      | 1      | 1      | 0      | 9      | 4       | 5      | 0      | 0       | 0      |
| pfam07586 | DUF1552     | 0      | 0      | 2       | 1       | 17     | 6      | 6      | 0      | 0      | 1      | 1      | 1      | 0      | 9      | 4       | 5      | 0      | 0       | 0      |

(a)

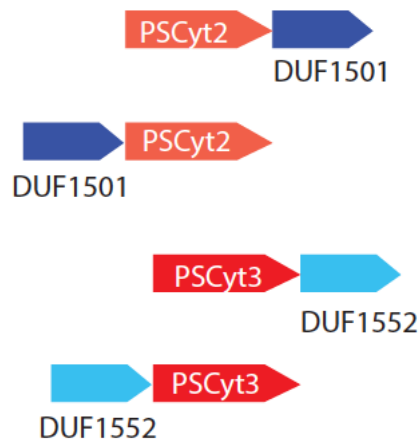

(b)
